# Supplementary material
Source: Springer Nature journal article supplement (https://www.springermedizin.de/resource/supplementary/12936_2007_422_MOESM1_ESM.pdf/9547418)

**1A.**Mboula (*An. gambiae* s.l.)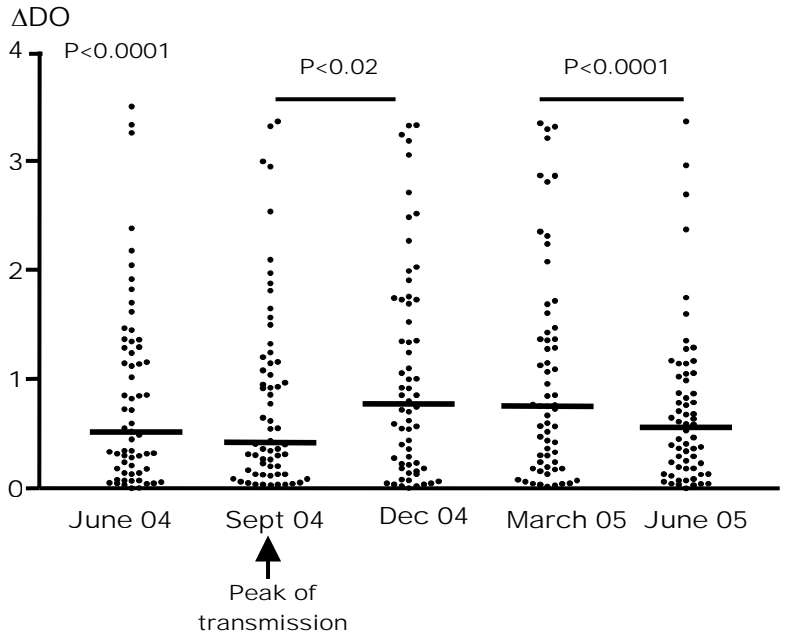**1B.**Gankette. Balla (*An. funestus*)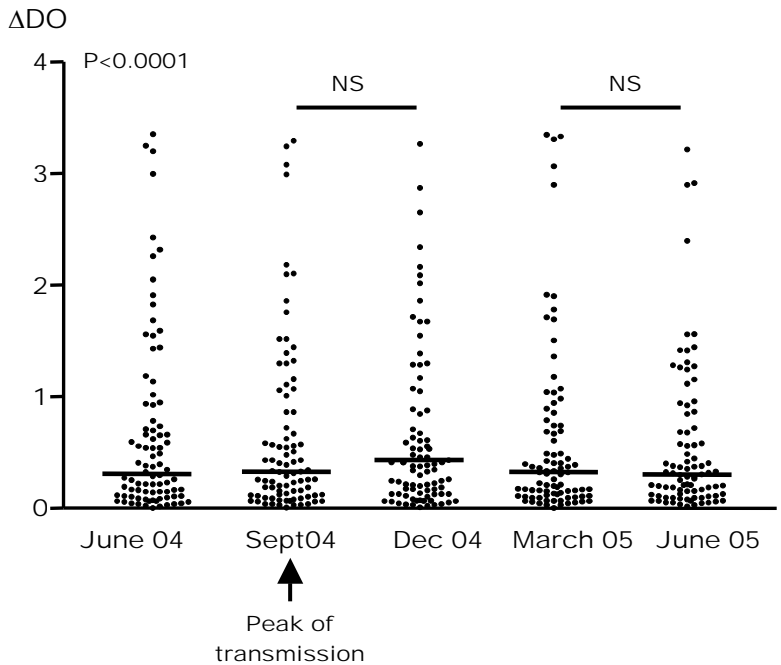

1C.

Median values

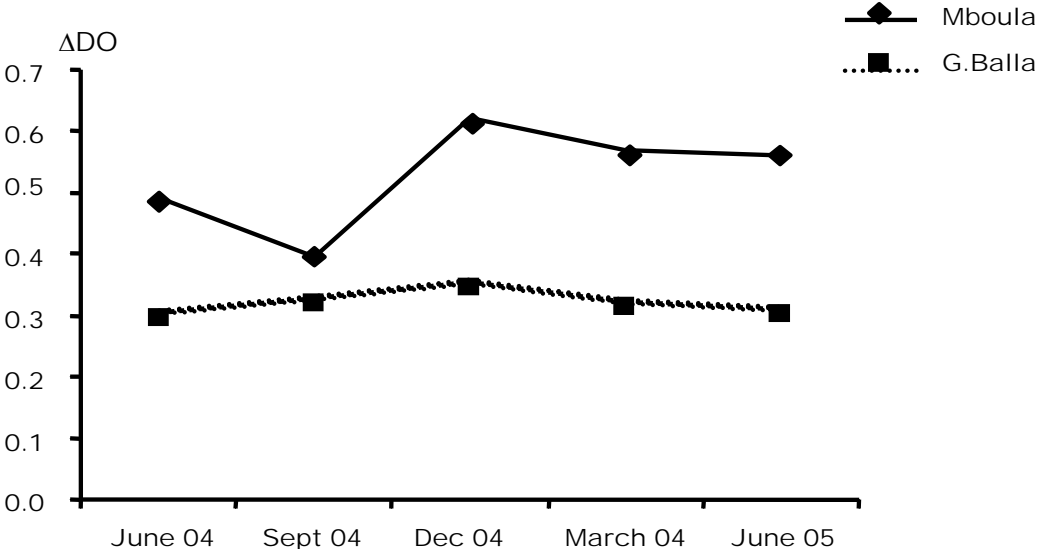

Supplement: MOESM1 [file 9547418]
